# Supplementary material for: Stereological Analysis of Liver Biopsy Histology Sections as a Reference Standard for Validating Non-Invasive Liver Fat Fraction Measurements by MRI
Source: PLoS One. 2016 Aug 8;11(8):e0160789. doi: 10.1371/journal.pone.0160789 (PMC4976876; doi:10.1371/journal.pone.0160789)
Supplement: S1 Table — (XLSX) [file pone.0160789.s001.xlsx]

## Sheet: Sheet1
S1 Table. Data reported in this study.
ID	AGE at MRI	GENDER	AETIOLOGY	BMI	LIC (mg/g dry tissue)	METAVIR	MRI-BIOPSY (DAYS)	Pathologist AC	Pathologist BD	Pathologist PB	Stereology Analyst W	Stereology Analyst S	Stereology Analyst M	HepaFat-Scan Analyst R	HepaFat-Scan Analyst S	HepaFat-Scan Analyst W
NF001	57	F	NASH	35.9	0.6	F2	56	70	60	80	28.96	18.45	12.93	19	19.5	19.1
NF002	22	M	PSC	27.4	1	F3	59	0	0	0	1.89	0	0.73	1.4	1.6	1.9
NF003	51	M	HCV	22.7	1.1	F4	3	2	0	0.5	1.48	0	0.76	1.7	1.7	1.8
NF004	56	M	CIRR	25.7	0.7	F4	460	0	0	0	1.95	0.49	4.48	2	2	1.9
NF005	59	M	NAFLD	26.3	1.1	F1	79	20	20	98	11.11	10.15	8.61	15.2	15.3	15.8
NF006	40	F	HBV-HCV	20.8	0.6	F2	8	0	0	0	3.94	1.52	1.01	1.2	1.1	1.2
NF007	51	F	HCV / HH	26.4	0.5	F2	45	2	0	1	2.48	0.75	1.73	3.5	3.5	3.6
NF008	56	M	NORM	23.7	0.9	F0	69	0	0	0.25	1	0	1.01	1.6	1.5	1.9
NF009	20	F	PSC	25.4	0.9	F3	50	0	0	0	1.95	0	1.26	2.2	2.1	0.9
NF010	62	F	AIH	25.4	0.5	F4	158	5	0	5	2.76	2.54	1.98	3.6	3.8	3.4
NF011	54	M	HCV	26.6	0.8	F4	9	75	60	90	10.73	5.02	7.87	12.2	12.8	13.3
NF012	61	F	HBV	23.1	1.3	F3	232	60	55	90	16.91	15.42	8.25	15.7	15	15.8
NF013	26	M	NASH	31.1	1	F0	171	55	10	50	12.69	8.17	7.75	14.5	13.4	16.6
NF014	65	M	HCV	23.7	0.7	F1	50	40	15	90	11.03	6.22	6.28	15.3	14.2	14.2
NF015	56	F	HCV	26	0.7	F3	-19	0	0	0	2.38	0.22	1.67	1.2	0.9	1
NF016	37	F	HBV	19.2	1	F1	15	1	0	0.5	1.21	0.51	1.49	2.1	1.4	1.8
NF017	49	F	HBV	28.5	1	F3	152	0	0	0	1.76	0	2.75	1.4	1.6	1.7
NF018	63	M	HEM	30.4	3.3	F1	-2	35	20	60	11.86	7.93	6.75	11.2	11.1	12.4
NF019	49	F	HBV	31.4	1.5	F2	73	0	0	0	1.24	1.01	1.53	1.2	1.2	1.2
NF021	62	M	AIH	30.5	0.5	F4	-1	2	0	1	3.9	0.25	1.76	7.3	7.1	7.5
NF022	48	F	Drug-induced liver injury	29	2.3	F0	298	0	0	0.25	2.84	1.16	2.5	1.5	2	1.6
NF023	20	M	PSC	22	0.5	F3	44	0	0	0	3.23	0	0.75	1.2	1.2	1.1
NF024	64	F	NASH	26.3	1.3	F1	-19	45	30	30	18.91	9.29	5.33	10.4	14.3	14.2
NF025	62	F	NAFLD	32.8	1.4	F0	223	25	10	25	12.86	5.67	6.68	7.1	7.5	9.5
NF026	67	F	NAFLD	33.1	0.7	F0	239	21	2.5	0.25	2.01	0.75	0.25	1.1	1.4	2.1
NF027	69	M	ALD	29.5	4.4	F1	36	1	0	0.5	2.92	0	2.53	2.7	3.6	2.6
NF028	39	M	NASH	33.3	0.4	F0	50	40	5	40	15.5	8.77	13.13	12.2	12.3	12.4
NF029	55	M	NASH	31.6	0.6	F1	157	70	60	70	14.71	11.59	13.07	15.6	16.8	15.1
NF030	64	M	NAFLD	28.7	1.3	F0	13	75	40	80	18.33	15.67	14.04	20.8	22.1	18.6
NF031	46	F	NORM	22.2	1.3	F0	76	0	0	0	2.17	0	1	1.6	1.5	1.6
NF032	43	M	NORM	32.4	1.4	F0	306	15	2.5	4	10.05	6.68	5.56	5.5	4.6	4.6
NF033	56	M	NAFLD	33.5	1.5	F0	58	0	0	0.25	3.59	0.52	0.72	1.9	2.1	2.3
NF034	36	M	NASH	30.2	0.6	F0	113	70	70	80	17.91	18.6	16.67	23.3	19.4	24.3
NF035	56	F	NASH	38.2	0.8	F1	72	25	10	20	7.8	5.5	4.02	8.2	9.4	9.9
NF036	22	M	NASH	18.4	0.9	F1	16	5	2.5	3	1.23	0.5	3.98	1.6	1.5	1.6
NF037	56	F	NASH	28.1	1.8	F2	57	85	55	95	19.16	13.55	10.77	20.6	17.2	17
NF038	40	M	PSC	32.3	1	F3	39	25	5	20	9.85	6.28	3.73	6.1	8.1	8.2
NF040	50	M	HCV	29.9	1.2	F1	48	7	2.5	5	1.01	1.52	1.2	3.9	3.8	4.3
NF041	60	M	HCV	27.3	1.4	F1	198	0	0	0	5.2	8.08	5.72	2.2	2	2.1
NF042	57	F	HCV	23.6	0.6	F3	20	0	0	0	8.21	1.24	3.88	1.7	1.3	1.7
NF044	72	F	NAFLD	27.6	1.7	F3	29	75	35	95	21.11	20.94	11.81	22.6	22.1	22.6
NF046	72	F	NAFLD	45.7	1	F0	162	30	2.5	30	14.39	8.98	7.75	9.2	9.2	8.8
NF047	60	F	NAFLD	30.1	1	F0	142	40	15	30	8.79	8.54	4.23	5.3	6.5	5.2
NF048	42	F	NAFLD	29.1	0.5	F0	44	60	40	40	14.85	11.24	10.85	18.1	18.2	17.4
NF050	46	F	ALD	35.3	0.6	F4	38	0	0	0	1.44	0.46	2.42	1.3	1.2	1
NF051	41	M	HBV	22	0.5	F1	117	0	0	5	1	0.76	3	0.7	0.8	0.8
NF052	39	M	HBV	21	2	F3	107	0	0	2	2.06	0	0.5	3	2.9	2.2
NF053	62	F	PBC	26.2	0.9	F3	23	1	0	0.5	5.4	0	1.75	1.3	2	1.9
NF055	43	M	HCV	28.7	0.5	F1	115	5	2.5	4	4.88	2.16	6.85	1.9	2.1	1.8
NF056	69	F	AIH	31.6	0.8	F2	135	0	0	Not read	4.41	1.01	3.48	2.7	2.8	2.4
NF057	60	M	NAFLD	29.4	0.6	F0	47	40	25	Not read	15	15	11.33	7.4	7.7	11.3
NF058	41	M	NASH	35.3	0.6	F1	106	85	85	Not read	39.14	30.15	28.64	28.4	25.7	28.2
NF059	49	M	NASH	27.7	2.7	F1	39	70	65	80	17.88	11.69	12.56	26.3	25.7	25.7
NF060	60	F	NASH	39.8	0.6	F4	-2	65	30	45	10.75	9.45	6.03	17.9	18.4	15
NF061	65	F	NASH	30.2	0.3	F1	62	90	80	95	30.09	25.72	20.25	32.1	32.9	33.2
NF062	61	F	NASH	32.3	0.6	F2	51	70	60	70	25.88	20.4	13.37	18.6	18.3	18.4
NF063	62	M	NASH	33.6	0.9	F0	28	85	70	80	33.41	27.21	26	20.4	20.7	21.6
NF064	58	F	NASH	34.9	1.3	F3	113	67	40	75	18.59	12.56	9.64	15.5	15.6	15.5
NF065	39	M	NASH	33.1	0.5	F3	100	75	20	85	13.79	18.16	13	28.8	28.9	27.4
Abbreviations: AIH, autoimmune hepatitis; ALD, alcoholic liver disease; BMI, body mass index; CIRR, cirrhosis; CON, control; HBV-HCV, viral hepatitis B/C; HEM, haemochromatosis; LIC, liver iron concentration; MRI, magnetic resonance imaging; NAFLD, non-alcoholic fatty liver disease; NASH, nonalcoholic steatohepatitis; NORM, normal; PBC, primary biliary cirrhosis; PSC, primary sclerosing cholangit…
